# Supplementary material for: Argentivorous molecules with two kinds of aromatic side-arms: intramolecular competition between side-arms
Source: Royal Society of Chemistry journal article supplement (doi:10.1039/c3dt00034f), 2013-01-01
Supplement: c3dt00034f.pdf [file c3dt00034f.pdf]

# Electronic Supporting Information for

## Argentivorous Molecules having Two Kinds of Aromatic Side-Arms: Intramolecular Competition between Side-Arms

*Yoichi Habata*<sup>\*,†,‡</sup>, *Yosuke Oyama*<sup>†</sup>, *Mari Ikeda*<sup>†,‡</sup> and *Shunsuke Kuwahara*<sup>†,‡</sup>

<sup>†</sup> Department of Chemistry, Faculty of Science, and <sup>‡</sup>Research Center for Materials with Integrated Properties, Toho University, 2-2-1 Miyama, Funabashi, Chiba 274-8510, Japan

habata@chem.sci.toho-u.ac.jp

## Table of Contents

|                                                                                                                                                         |    |
|---------------------------------------------------------------------------------------------------------------------------------------------------------|----|
| <b>Figure S1.</b> Synthetic scheme.                                                                                                                     | 3  |
| <b>Figure S2.</b> $^1\text{H}$ NMR spectrum of <b>1</b> in $\text{CDCl}_3$ .                                                                            | 4  |
| <b>Figure S3.</b> $^1\text{H}$ NMR spectrum of <b>2</b> in $\text{CDCl}_3$ .                                                                            | 4  |
| <b>Figure S4.</b> $^1\text{H}$ NMR spectrum of <b>3</b> in $\text{CDCl}_3$ .                                                                            | 5  |
| <b>Figure S5.</b> X-ray structure of <b>1</b> .                                                                                                         | 6  |
| <b>Figure S6.</b> X-ray structure of <b>2</b> .                                                                                                         | 6  |
| <b>Figure S7.</b> X-ray structure of <b>3</b>                                                                                                           | 7  |
| <b>Figure S8.</b> X-ray structure of <b>1</b> / $\text{Cu}(\text{CF}_3\text{SO}_3)_2$ complex.                                                          | 7  |
| <b>Figure S9.</b> $\text{Ag}^+$ -ion-induced $^1\text{H}$ NMR spectral changes of <b>1</b> (in $\text{CD}_2\text{Cl}_2/\text{CD}_3\text{OD}$ ).         | 8  |
| <b>Figure S10.</b> $\text{Ag}^+$ -ion-induced $^1\text{H}$ NMR spectral changes of <b>2</b> (in $\text{CD}_2\text{Cl}_2/\text{CD}_3\text{OD}$ ).        | 8  |
| <b>Figure S11.</b> $\text{Ag}^+$ -ion-induced $^1\text{H}$ NMR spectral changes of <b>3</b> (in $\text{CD}_2\text{Cl}_2/\text{CD}_3\text{OD}$ ).        | 9  |
| <b>Figure S12.</b> $\text{Ag}^+$ -ion-induced UV-vis spectral changes of <b>2</b> . $[\text{2}] = 1.0 \times 10^{-4}$ mol/L ( $\text{CH}_3\text{CN}$ ). | 10 |
| <b>Figure S13.</b> $\text{Ag}^+$ -ion-induced UV-vis spectral changes of <b>3</b> . $[\text{3}] = 1.0 \times 10^{-4}$ mol/L ( $\text{CH}_3\text{CN}$ ). | 10 |
| <b>Figure S14.</b> Nonlinear least-squares analyses of the titration profiles of <b>1</b> .                                                             | 11 |
| <b>Figure S15.</b> Nonlinear least-squares analyses of the titration profiles of <b>2</b> .                                                             | 12 |
| <b>Figure S16.</b> Nonlinear least-squares analyses of the titration profiles of <b>3</b> .                                                             | 13 |
| <b>Figure S17.</b> The LUMOs and HOMOs of <b>1</b> / $\text{Ag}^+$ , <b>2</b> / $\text{Ag}^+$ , and <b>3</b> / $\text{Ag}^+$ complexes.                 | 14 |

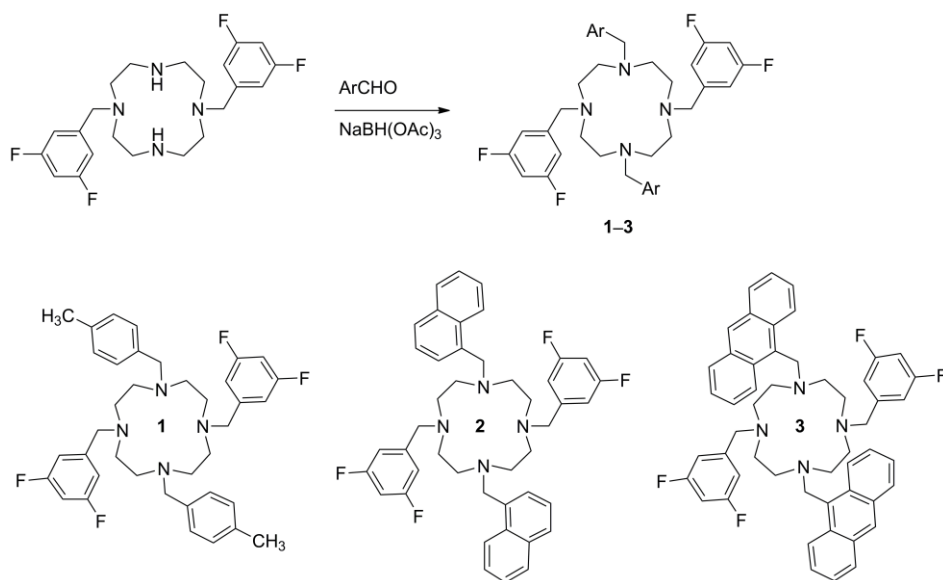

**Figure S1.** Synthetic scheme.

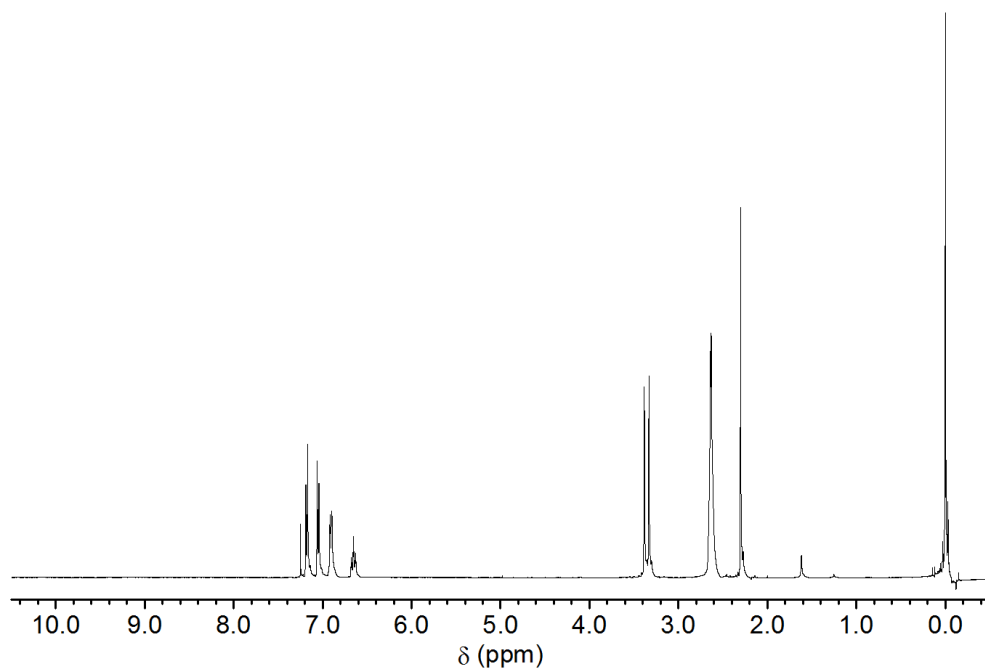

**Figure S2.** <sup>1</sup>H NMR spectrum of **1** in CDCl<sub>3</sub>.

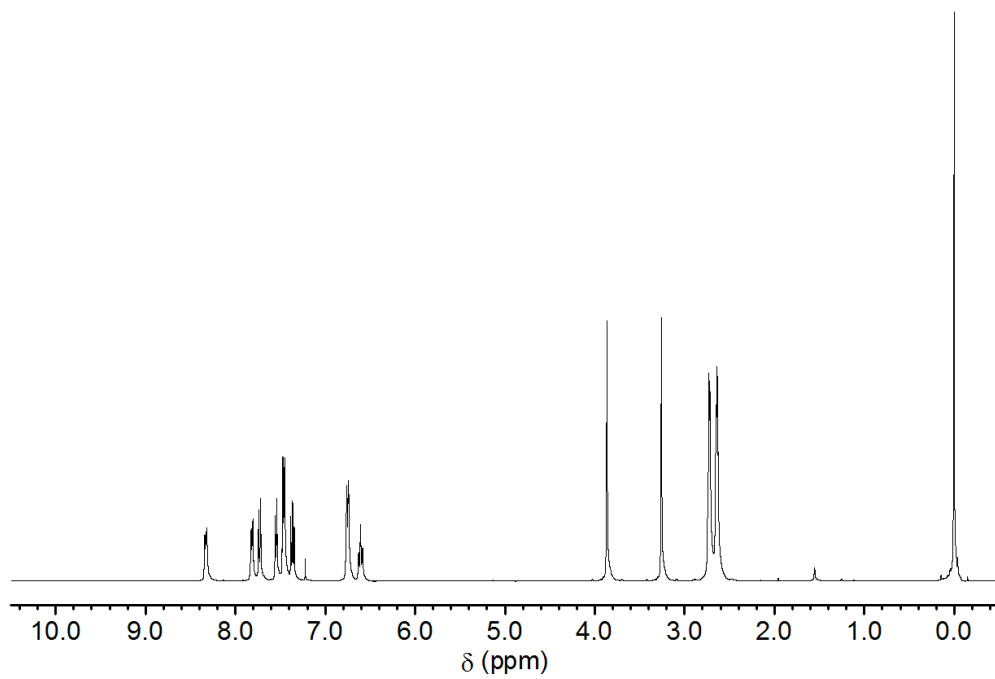

**Figure S3.** <sup>1</sup>H NMR spectrum of **2** in CDCl<sub>3</sub>.

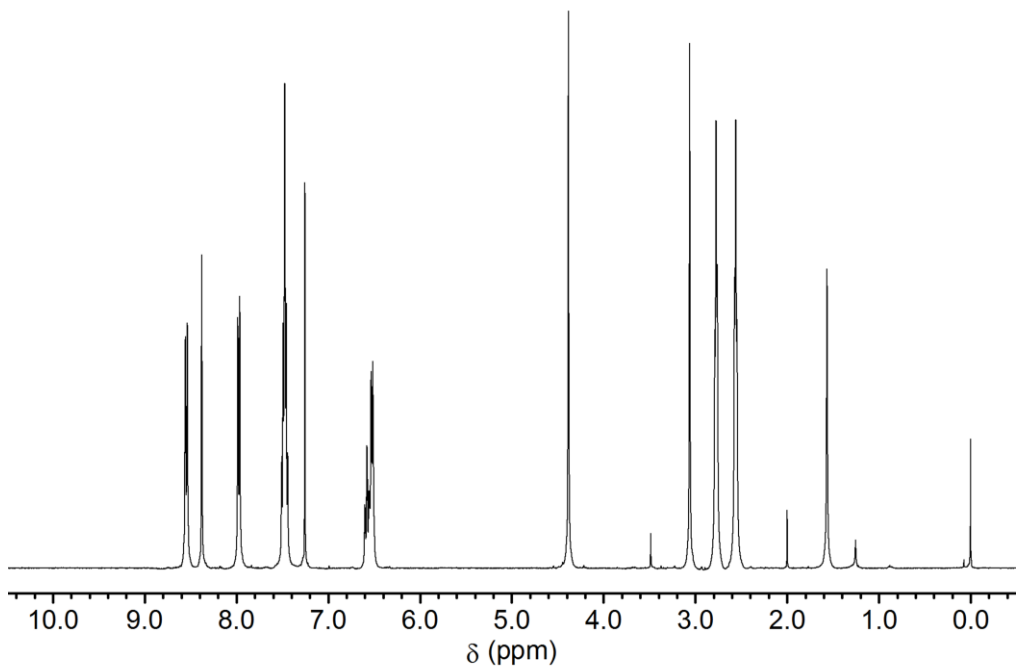

**Figure S4.**  $^1\text{H}$  NMR spectrum of **3** in  $\text{CDCl}_3$ .

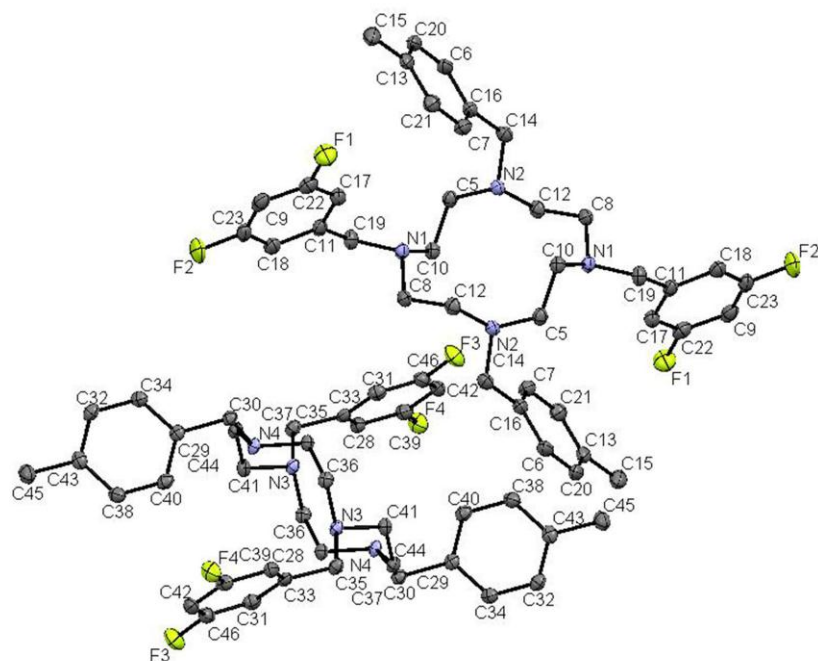

**Figure S5.** X-ray structure of **1** (50% probability level). Hydrogen atoms omitted.

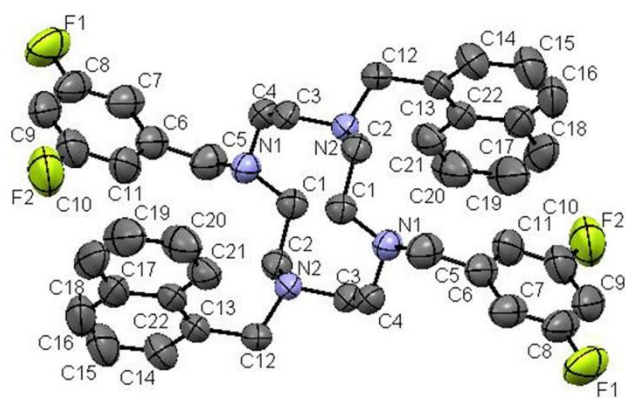

**Figure S6.** X-ray structure of **2** (50% probability level). Hydrogen atoms omitted.

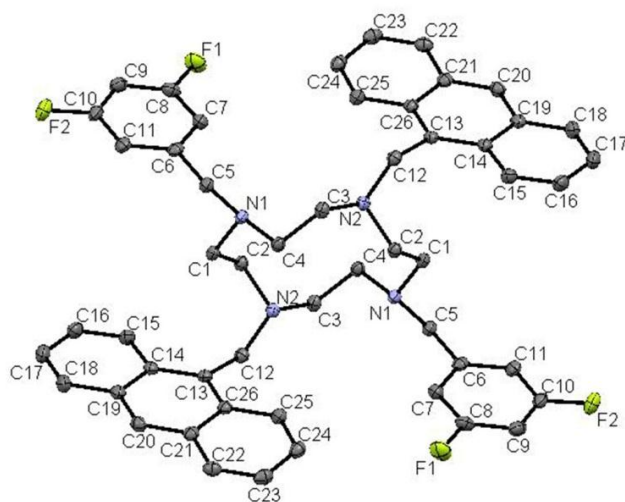

**Figure S7.** X-ray structure of **3** (50% probability level). Hydrogen atoms omitted.

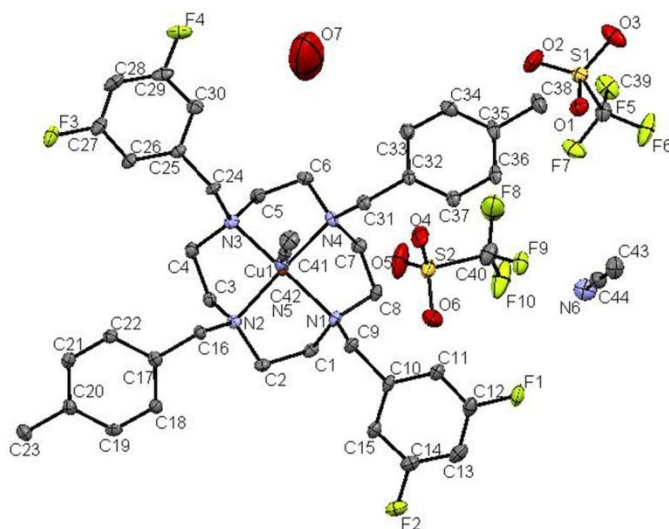

**Figure S8.** X-ray structure of **1**/ $\text{Cu}(\text{CF}_3\text{SO}_3)_2$  complex (50% probability level). Hydrogen atoms omitted.

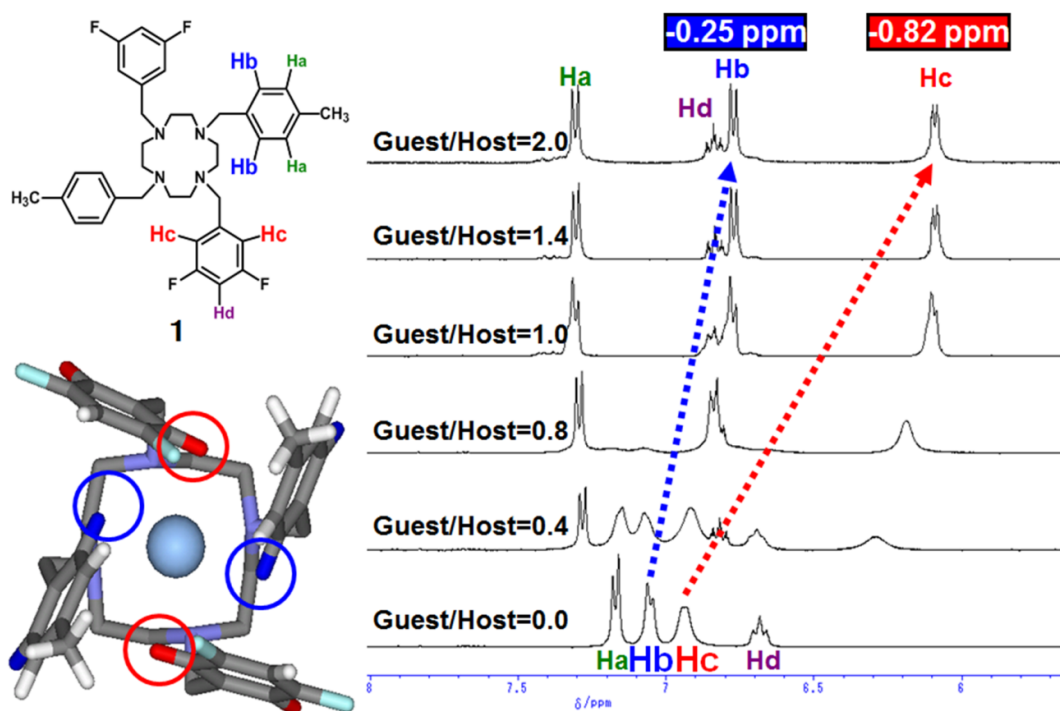

**Figure S9.** Ag<sup>+</sup>-ion-induced <sup>1</sup>H NMR spectral changes of **1** (in CD<sub>2</sub>Cl<sub>2</sub>/CD<sub>3</sub>OD).

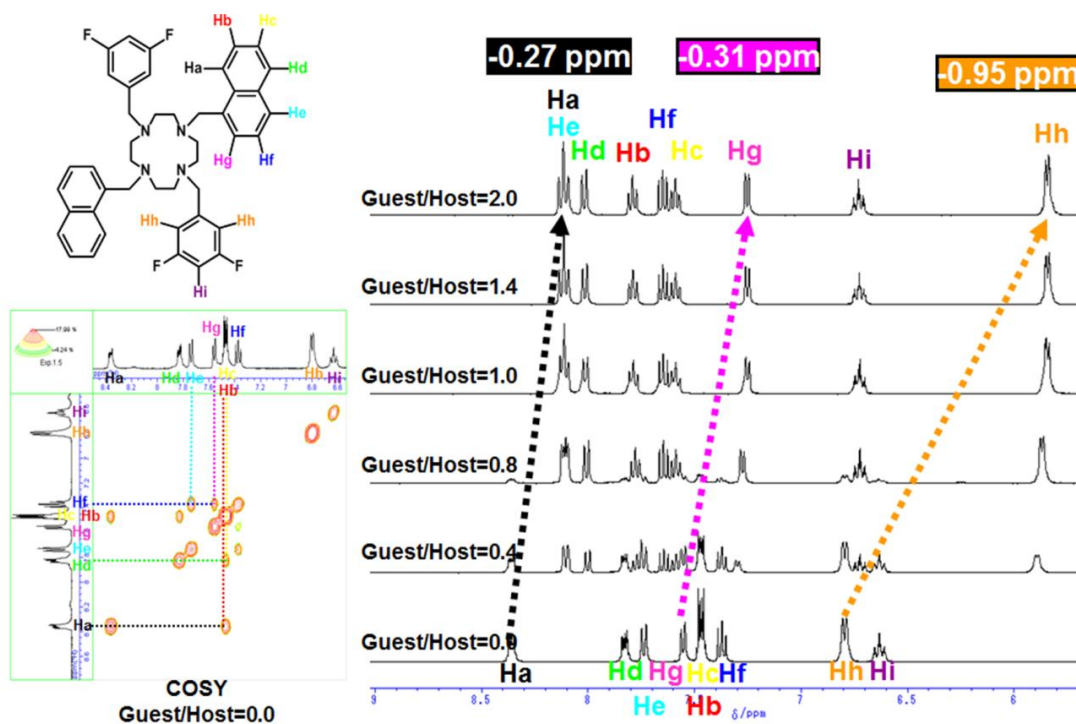

**Figure S10.** Ag<sup>+</sup>-ion-induced <sup>1</sup>H NMR spectral changes of **2** (in CD<sub>2</sub>Cl<sub>2</sub>/CD<sub>3</sub>OD).



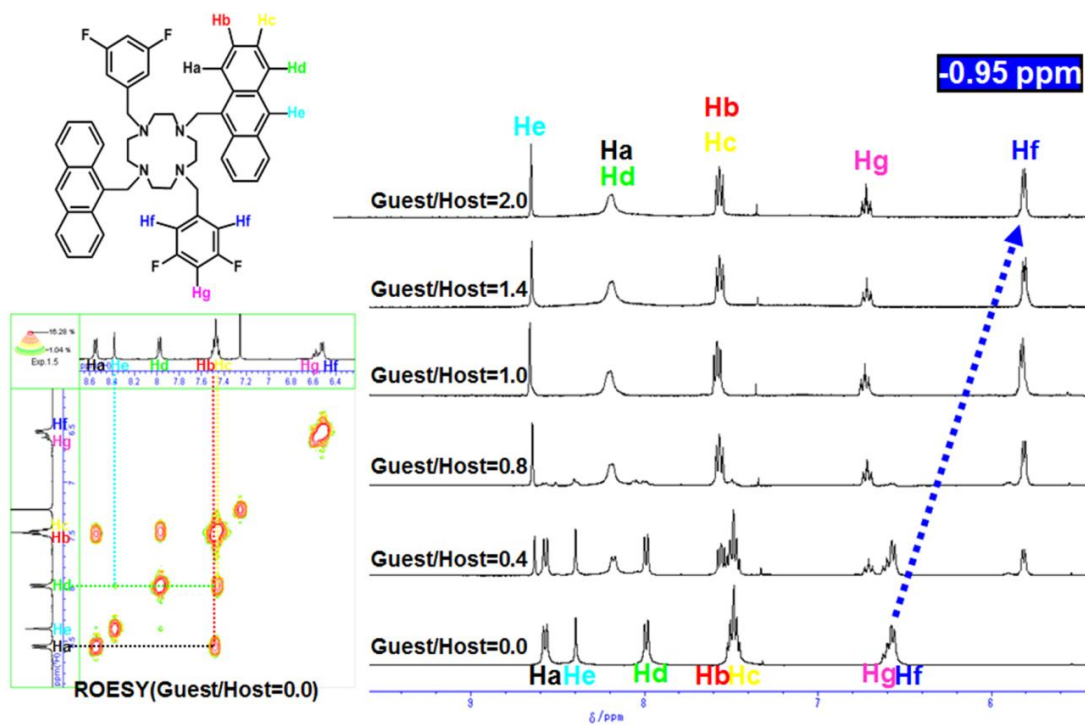

**Figure S11.**  $\text{Ag}^+$ -ion-induced  $^1\text{H}$  NMR spectral changes of **3** (in  $\text{CD}_2\text{Cl}_2/\text{CD}_3\text{OD}$ ).

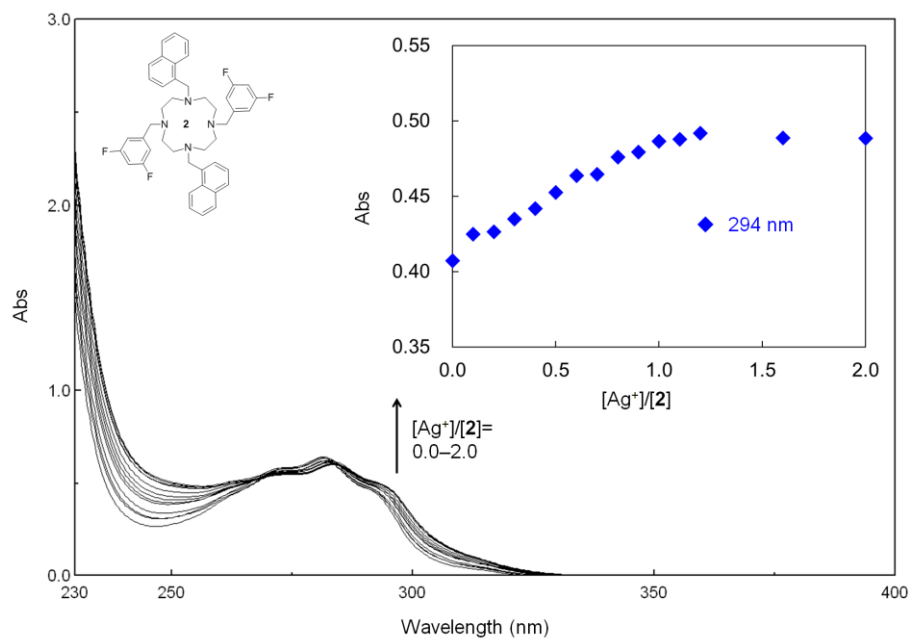

**Figure S12.**  $\text{Ag}^+$ -ion-induced UV-vis spectral changes of **2**.  $[\mathbf{2}] = 1.0 \times 10^{-4}$  mol/L ( $\text{CH}_3\text{CN}$ ).

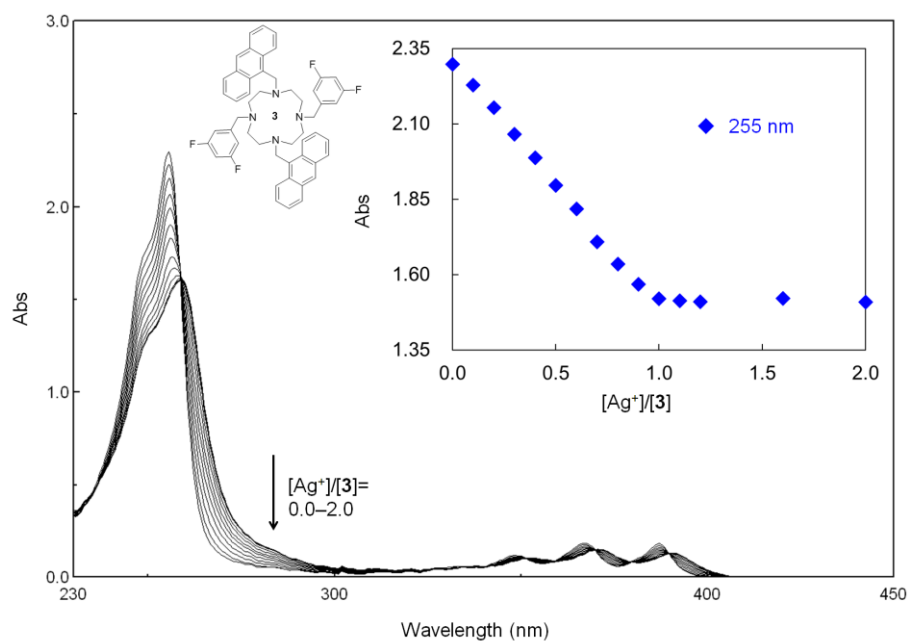

**Figure S13.**  $\text{Ag}^+$ -ion-induced UV-vis spectral changes of **3**.  $[\mathbf{3}] = 1.0 \times 10^{-4}$  mol/L ( $\text{CH}_3\text{CN}$ ).

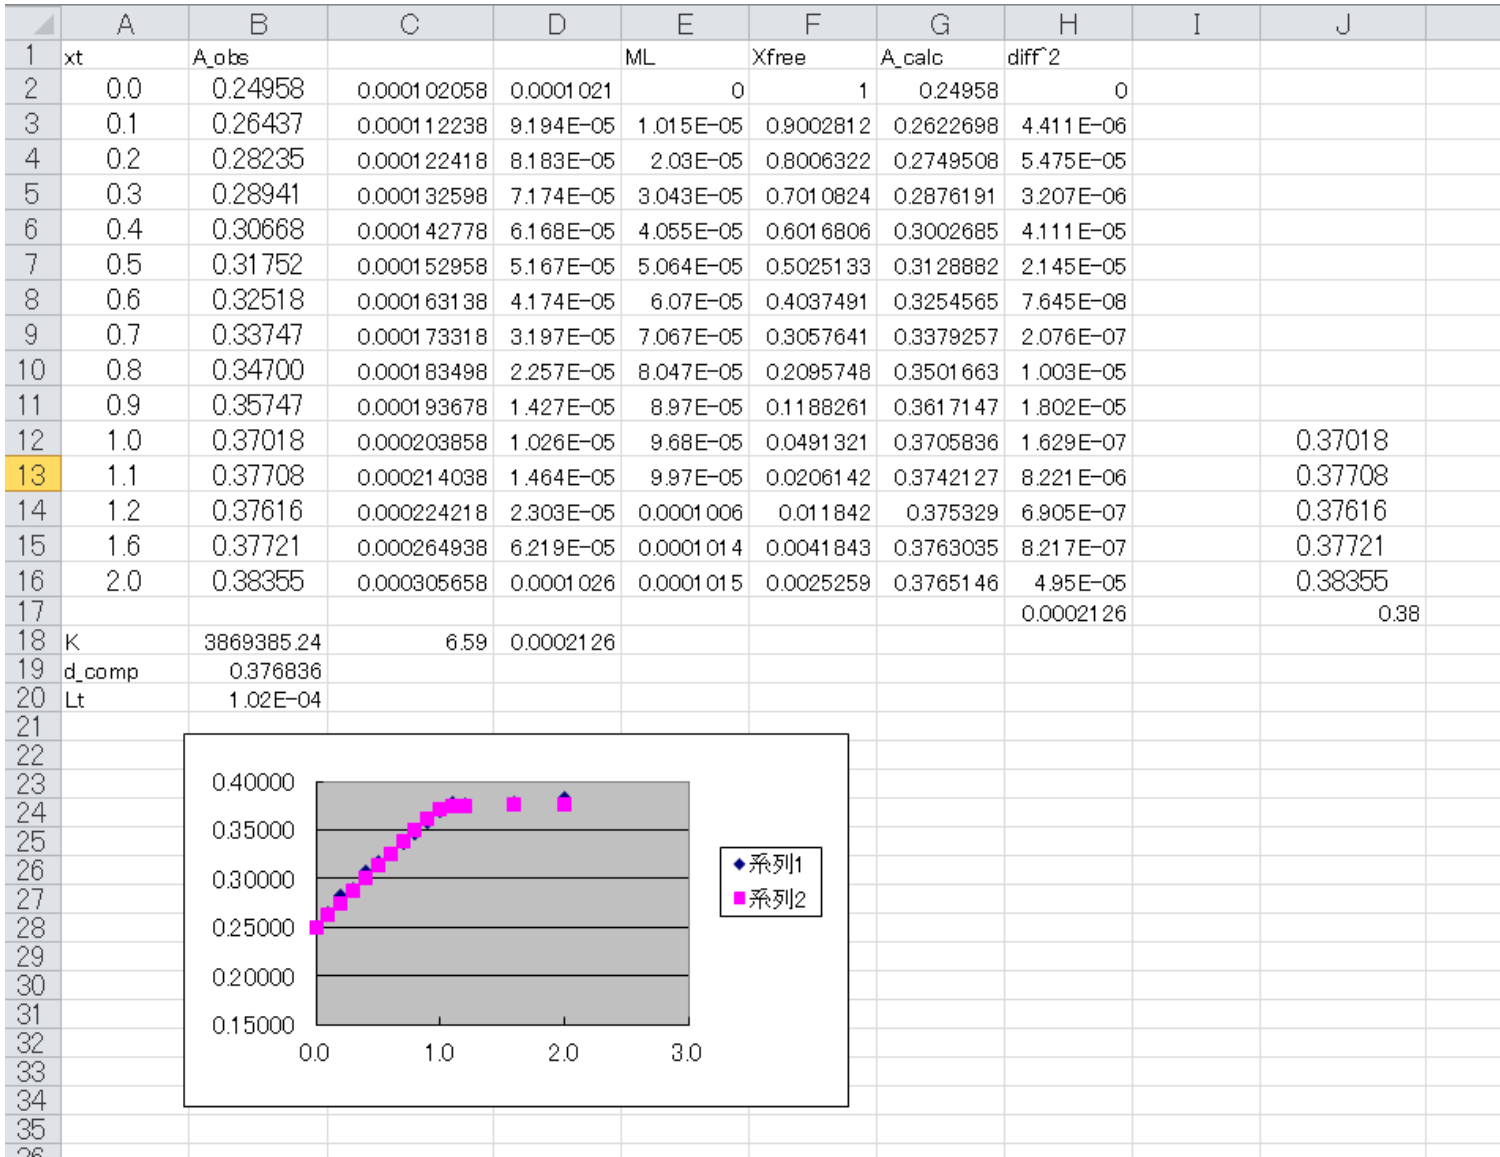

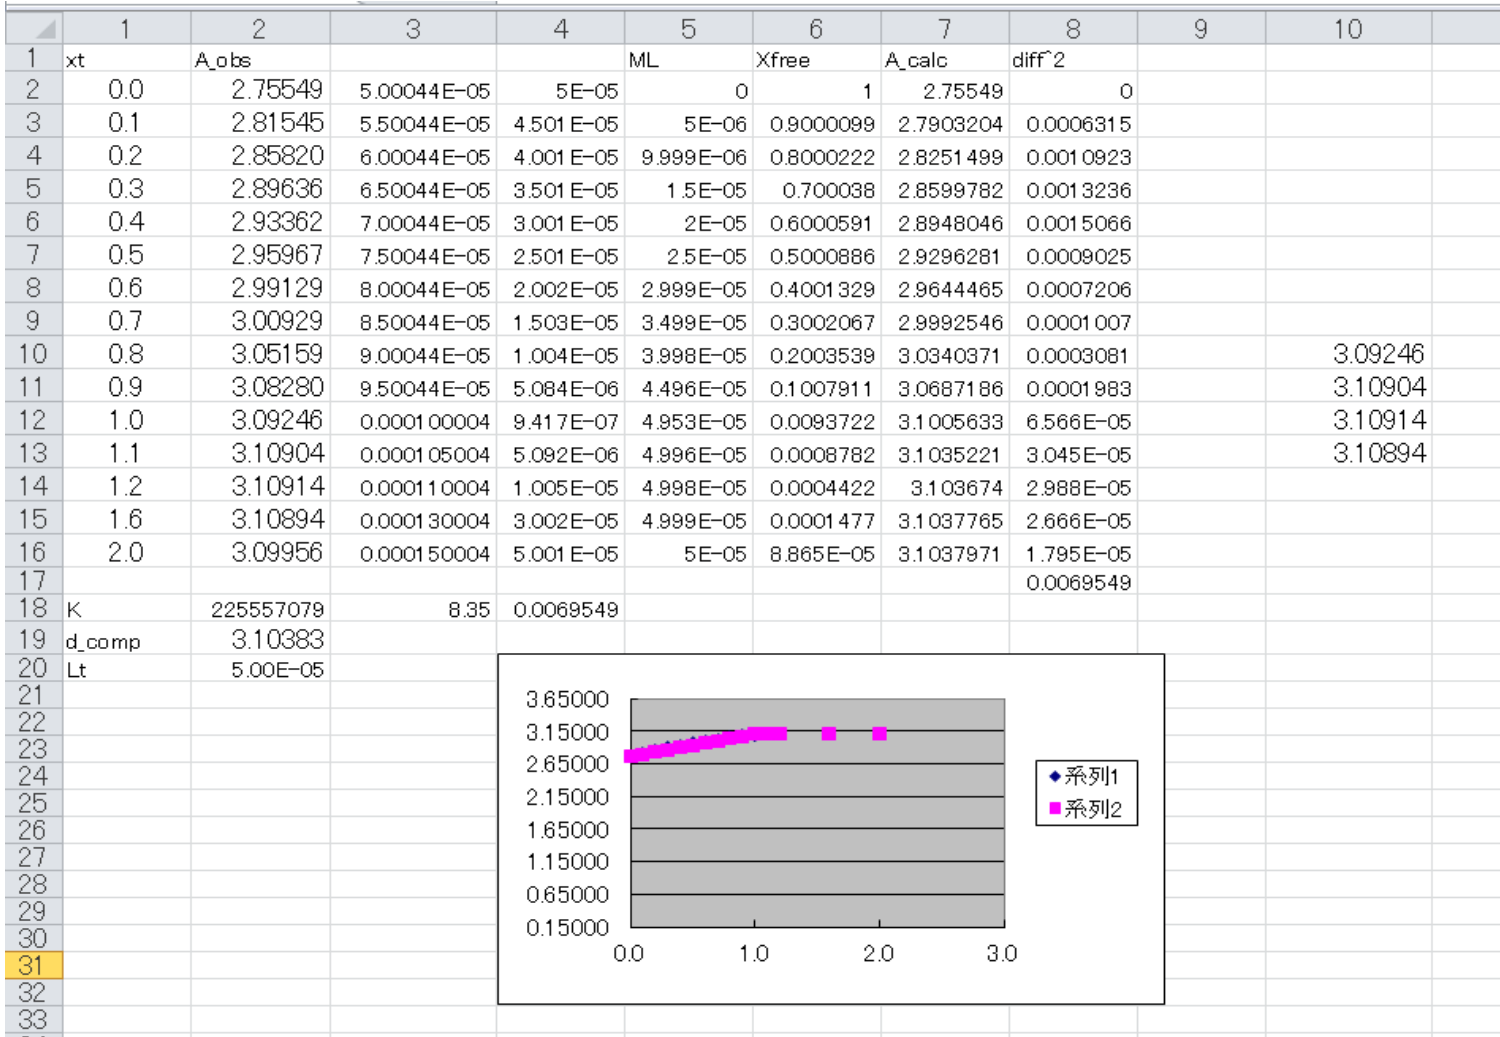

Figure S15. Nonlinear least-squares analyses of the titration profiles of 2.

|    | 1      | 2           | 3            | 4          | 5          | 6          | 7         | 8          | 9         | 10   | 11          |
|----|--------|-------------|--------------|------------|------------|------------|-----------|------------|-----------|------|-------------|
| 1  | xt     | A_obs       |              |            | ML         | Xfree      | A_calc    | diff^2     |           |      |             |
| 2  | 0      | 2.29708     | 1.00001 E-05 | 1 E-05     | 0          | 1          | 2.29708   | 0          |           |      |             |
| 3  | 0.1    | 2.22822     | 1.10001 E-05 | 9 E-06     | 1 E-06     | 0.9000001  | 2.218768  | 8.934 E-05 |           |      |             |
| 4  | 0.2    | 2.15262     | 1.20001 E-05 | 8 E-06     | 2 E-06     | 0.8000022  | 2.1404561 | 0.000148   |           |      |             |
| 5  | 0.3    | 2.06479     | 1.30001 E-05 | 7 E-06     | 3 E-06     | 0.7000038  | 2.0621446 | 6.998 E-06 |           |      |             |
| 6  | 0.4    | 1.98649     | 1.40001 E-05 | 6 E-06     | 4 E-06     | 0.6000059  | 1.9838334 | 7.057 E-06 |           |      |             |
| 7  | 0.5    | 1.89498     | 1.50001 E-05 | 5 E-06     | 5 E-06     | 0.5000089  | 1.9055229 | 0.000112   |           |      |             |
| 8  | 0.6    | 1.81675     | 1.60001 E-05 | 4 E-06     | 6 E-06     | 0.4000133  | 1.8272136 | 0.0001095  |           |      |             |
| 9  | 0.7    | 1.7079      | 1.70001 E-05 | 3.001 E-06 | 7 E-06     | 0.3000207  | 1.7489066 | 0.0016815  |           |      |             |
| 10 | 0.8    | 1.63426     | 1.80001 E-05 | 2.001 E-06 | 8 E-06     | 0.2000355  | 1.6706054 | 0.001321   |           |      |             |
| 11 | 0.9    | 1.56723     | 1.90001 E-05 | 1.002 E-06 | 8.999 E-06 | 0.1000797  | 1.5923272 | 0.0006299  |           |      |             |
| 12 | 1      | 1.5194      | 2.00001 E-05 | 5.955 E-08 | 9.97 E-06  | 0.0029729  | 1.5162802 | 9.733 E-06 |           |      |             |
| 13 | 1.1    | 1.51205     | 2.10001 E-05 | 1.002 E-06 | 9.999 E-06 | 8.856 E-05 | 1.5140214 | 3.886 E-06 |           |      |             |
| 14 | 1.2    | 1.50957     | 2.20001 E-05 | 2.001 E-06 | 1 E-05     | 4.431 E-05 | 1.5139867 | 1.951 E-05 |           |      |             |
| 15 | 1.6    | 1.52036     | 2.60001 E-05 | 6 E-06     | 1 E-05     | 1.477 E-05 | 1.5139636 | 4.091 E-05 | 180000000 | 8.26 | 0.000449431 |
| 16 | 2      | 1.50838     | 3.00001 E-05 | 1 E-05     | 1 E-05     | 8.865 E-06 | 1.5139589 | 3.112 E-05 | 200000000 | 8.30 | 0.000449394 |
| 17 |        |             |              |            |            |            |           | 0.0042096  | 250000000 | 8.40 | 0.000449349 |
| 18 | K      | 1.1281 E+10 | 10.05        | 0.0042096  |            |            |           |            | 275000000 | 8.44 | 0.000449342 |
| 19 | d_comp | 1.513952    |              |            |            |            |           |            | 290000000 | 8.46 | 0.000449340 |
| 20 | Lt     | 1.00 E-05   |              |            |            |            |           |            | 295000000 | 8.47 | 0.00044934  |
| 21 |        |             |              |            |            |            |           |            | 300000000 | 8.48 | 0.000449340 |
| 22 |        |             |              |            |            |            |           |            | 305000000 | 8.48 | 0.000449341 |
| 23 |        |             |              |            |            |            |           |            | 310000000 | 8.49 | 0.000449341 |
| 24 |        |             |              |            |            |            |           |            | 325000000 | 8.51 | 0.000449343 |
| 25 |        |             |              |            |            |            |           |            | 350000000 | 8.54 | 0.000449348 |
| 26 |        |             |              |            |            |            |           |            |           |      |             |
| 27 |        |             |              |            |            |            |           |            |           |      |             |
| 28 |        |             |              |            |            |            |           |            |           |      |             |
| 29 |        |             |              |            |            |            |           |            |           |      |             |
| 30 |        |             |              |            |            |            |           |            |           |      |             |
| 31 |        |             |              |            |            |            |           |            |           |      |             |
| 32 |        |             |              |            |            |            |           |            |           |      |             |
| 33 |        |             |              |            |            |            |           |            |           |      |             |
| 34 |        |             |              |            |            |            |           |            |           |      |             |
| 35 |        |             |              |            |            |            |           |            |           |      |             |

Figure S16. Nonlinear least-squares analyses of the titration profiles of 3.

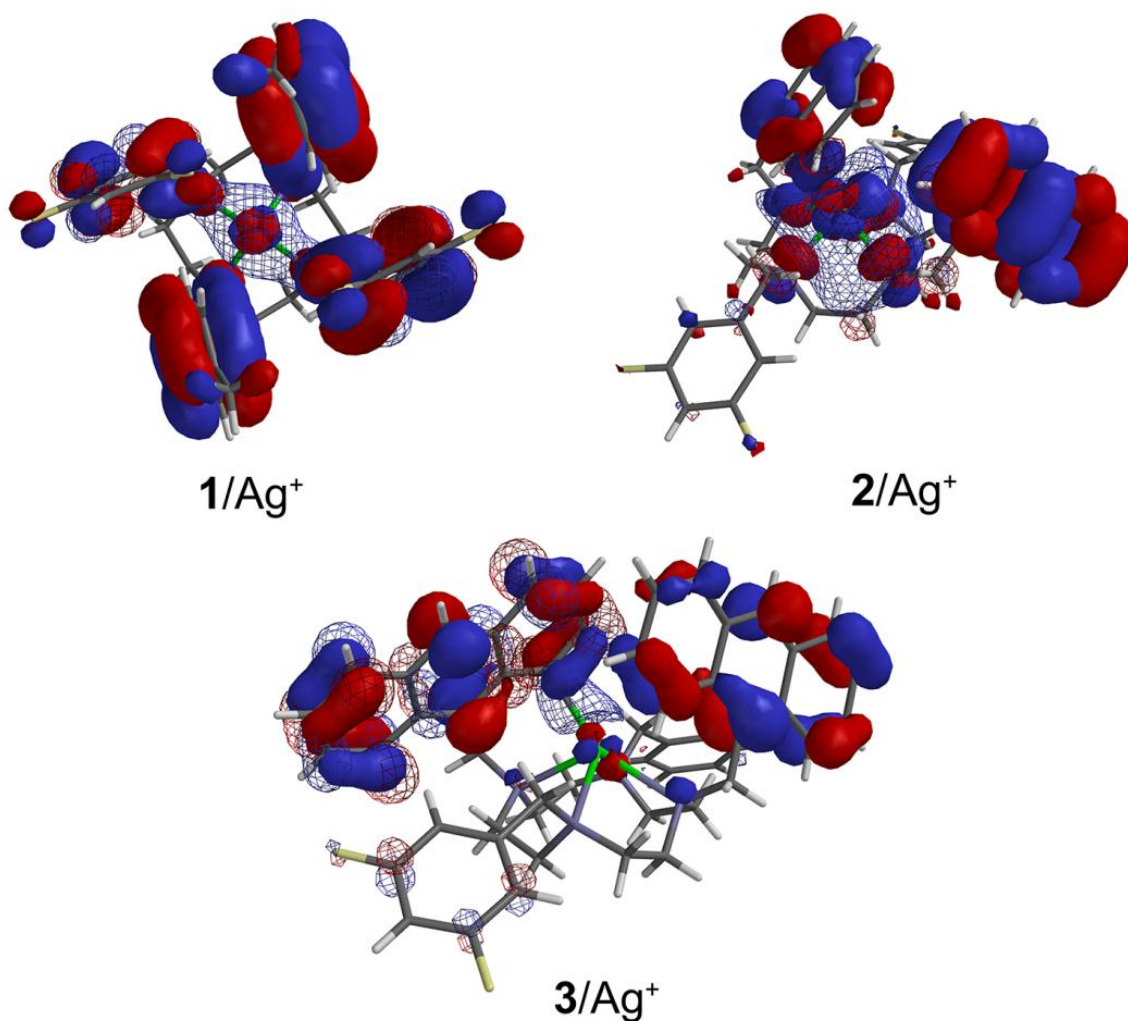

**Figure S14.** The LUMOs and HOMOs calculated by the DFT methods [B3LYP/3-21G(\*)] using the X-ray structures of the  $\text{Ag}^+$  complexes with **1–2** (Isosurface value is 0.032 au).

**1**/ $\text{Ag}^+$  complx, LUMO (mesh) and HOMO[–4], HOMO[–5], HOMO[–6] , HOMO[–7] (solid).

**2** $\text{Ag}^+$  complx, LUMO[+9] (mesh) and HOMO[–2], HOMO[–4], HOMO[–7] (solid).

**3**/ $\text{Ag}^+$  complx, LUMO[+6] (mesh) and HOMO[–5], HOMO[–6], HOMO[–7], HOMO[–8] (solid).
